# Supplementary material
Source: PubMed Central journal article supplement (PMC11373991)
Supplement: PBI-22-284-s001.pdf [file PBI-22-284-s001.pdf]

## Supplemental figures

**Enhanced late blight resistance by engineering an EpiC2B-insensitive immune protease** Mariana Schuster, Sophie Eisele, Liz Armas-Egas, Till Kessenbrock, Jiorgos Kourelis, Markus Kaiser, and Renier A. L. van der Hoorn

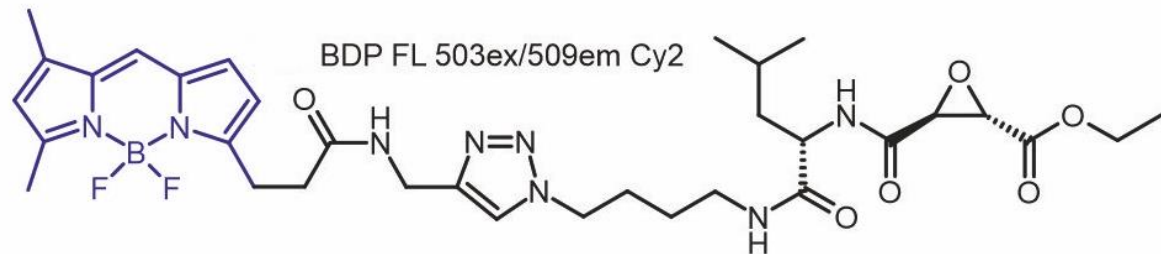

**Figure S1** TK011 is an E-64-based fluorescent probe.  
Structure of the TK011 probe consisting of a E64-azide linked to an BDP-FL-alkyne (blue).

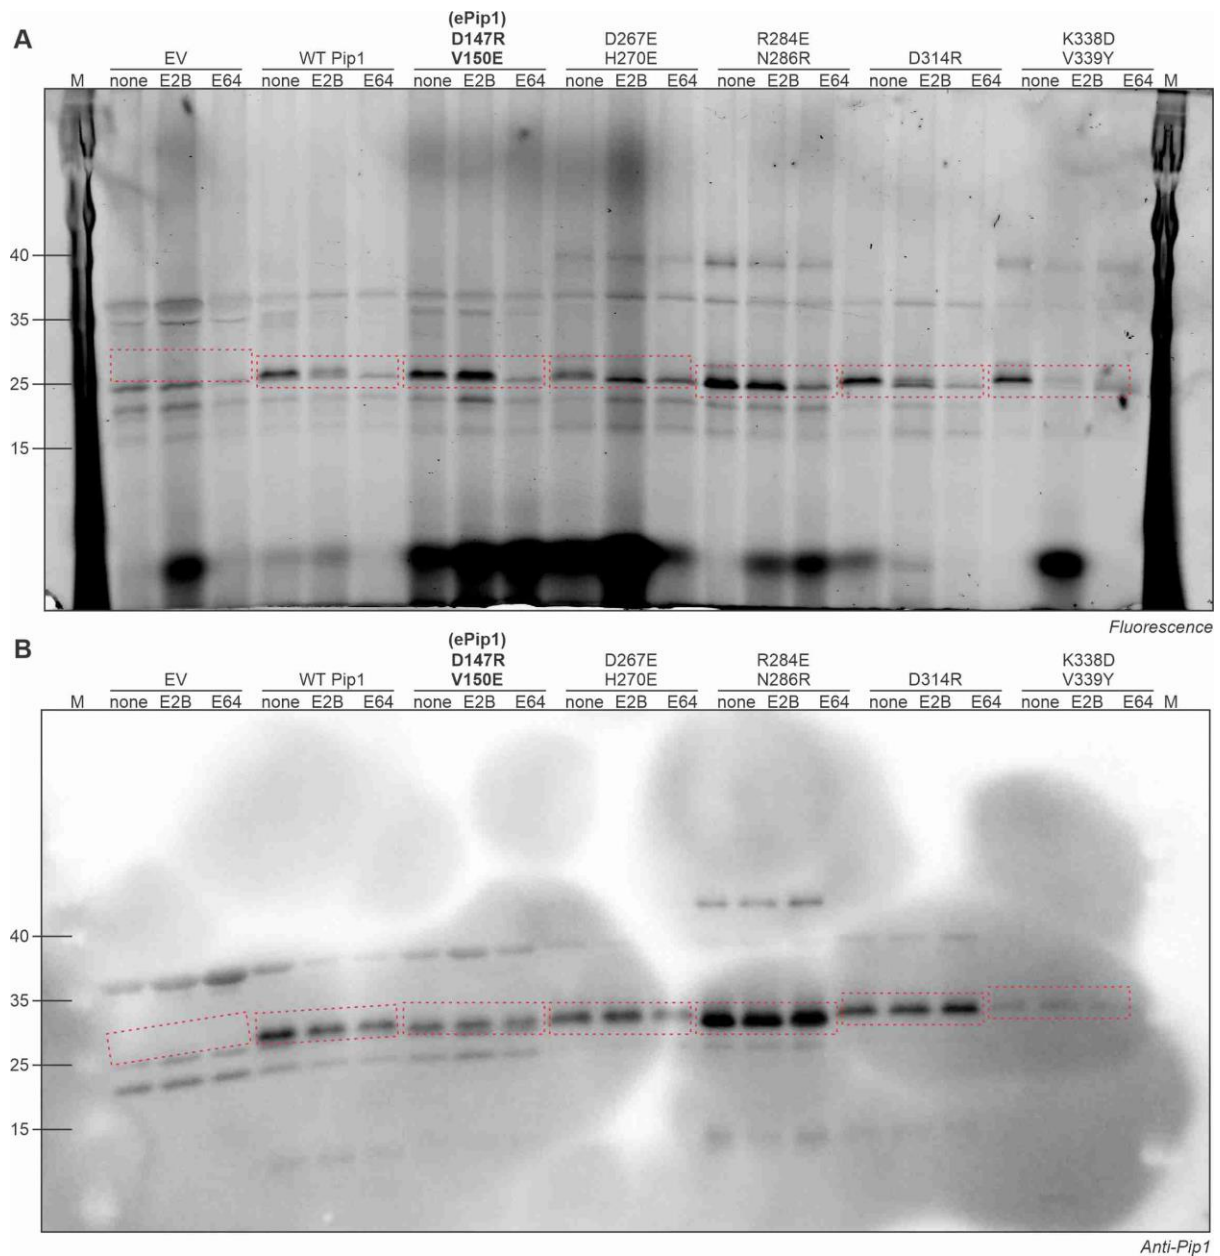

**Figure S2** Uncropped gel and blot used for Fig1B.

Apoplastic fluids isolated from agroinfiltrated leaves transiently expressing (mutant) Pip1 were pre-incubated for 30 min with and without 100  $\mu$ M E-64 or 3  $\mu$ M EpiC2B, and then labelled for 3 hours with 0.2  $\mu$ M TK011. Samples were separated on SDS-PAGE gels, scanned for fluorescence (top) and then transferred onto a membrane for an  $\alpha$ -Pip1 western blot (bottom).

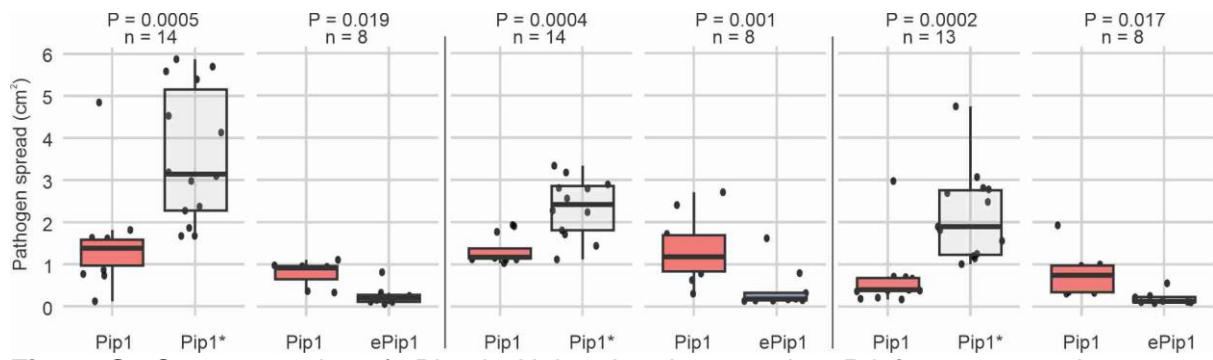

**Figure S3** Overexpression of ePip1 in *N. benthamiana* restricts *P. infestans* spread.

Three independent replicates of the experiment are shown. Data of the second replicate was used in the main figure. P values correspond to paired *t*-test for n=x biological replicates.
